# Supplementary material for: Social health insurance coverage and financial protection among rural-to-urban internal migrants in China: evidence from a nationally representative cross-sectional study
Source: PubMed Central journal article supplement — BMJ Glob Health. 2017 Oct 16;2(4):e000477. doi: 10.1136/bmjgh-2017-000477 (PMC5652549; doi:10.1136/bmjgh-2017-000477), 2017-10-16
Supplement: bmjgh-2017-000477supp001.pdf [file bmjgh-2017-000477supp001.pdf]

**Table S1 119 strata and the corresponding sample size in 2014 National Internal Migrant Dynamic Monitoring Survey**

| <b>Provincial divisions<br/>(Sample size)</b>      | <b>Strata within provincial divisions (sample size)</b>                                                                                     |
|----------------------------------------------------|---------------------------------------------------------------------------------------------------------------------------------------------|
| Beijing (8,000)                                    | Chaoyang (2,000), Haidian (1,200), Fengtai (1,000), Daxing (1,000), Tongzhou (1,000), Changping (1,000), Other districts (800)              |
| Tianjin (6,000)                                    | Binhai (1,600), Jinnan (1,000), three-major-district (1,200), Other districts (2,200)                                                       |
| Hebei (5,000)                                      | Shijiazhuang (2,000), Urban group1 (2,000), Other cities(1,000)                                                                             |
| Shanxi (5,000)                                     | Taiyuan (2,000), Datong (1,000), Urban group2(1,200), Other cities (800)                                                                    |
| Inner Mongolia (5,000)                             | Huhhot (2,000), Urban group3 (2,200), Other cities (800)                                                                                    |
| Liaoning (5,000)                                   | Shenyang (2,000), Dalian (2,000), Other cities (1,000)                                                                                      |
| Jilin (4,000)                                      | Changchun (2,000), Other cities (2,000)                                                                                                     |
| Heilongjiang (10,000)                              | Harbin (3,000), Daqing (2,000), Heihe (600), Suifenhe (1,000), Reclamation Area General Bureau (1,800), Other cities (1,600)                |
| Shanghai (8,000)                                   | Pudong (2,000), Minhang (1,200), Yangpu (600), Songjiang (2,000), Baoshan (800), Other districts (1,400)                                    |
| Jiangsu (12,000)                                   | Nanjing (2,000), Suzhou (4,000), Wuxi (2,000), Changzhou (1,200), Nantong (1,000), Other cities (1,800)                                     |
| Zhejiang (14,000)                                  | Hangzhou (2,000), Ningbo (2,000), Wenzhou (2,000), Jiaxing (2,000), Huzhou (1,000), Shaoxing (1,000), Taizhou (1,000), Other cities (3,000) |
| Anhui (5,000)                                      | Hefei (2,000), Other cities (3,000)                                                                                                         |
| Fujian (7,000)                                     | Fuzhou (2,000), Xiamen (2,000), Quanzhou (2,000), Other cities (1,000)                                                                      |
| Jiangxi (5,000)                                    | Nanchang (2,000), Other cities (3,000)                                                                                                      |
| Shandong (6,000)                                   | Jinan (2,000), Qingdao (2,000), Urban group4 (1,400), Other cities (600)                                                                    |
| Henan (6,000)                                      | Zhengzhou (2,000), Urban group5 (2,000), Other cities (2,000)                                                                               |
| Hubei (6,000)                                      | Wuhan (2,000), Other cities (4,000)                                                                                                         |
| Hunan (7,000)                                      | Changsha (2,800), South-Hunan three-city region (1,600), Urban group6 (1,200), Other cities (1,400)                                         |
| Guangdong (12,000)                                 | Guangzhou (2,000), Shenzhen (2,000), Foshan (2,000), Zhongshan (2,000), Dongguan (2,000), Urban group7 (1,000), Other cities (1,000)        |
| Guangxi (6,000)                                    | Nanning (2,000), Guilin(1,000), Urban group8 (1,000), Other cities (2,000)                                                                  |
| Hainan (5,000)                                     | Haikou (2,000), Sanya (1,600), Other cities (1,400)                                                                                         |
| Chongqing (6,000)                                  | Yubei (1,000), Other districts (5,000)                                                                                                      |
| Sichuan (6,000)                                    | Chengdu (2,000), Urban group9 (2,800), Other cities (1,200)                                                                                 |
| Guizhou (4,000)                                    | Guiyang (2,000), Urban group10 (1,400), Other cities (600)                                                                                  |
| Yunnan (5,000)                                     | Kunming(2,000), Yuxi (600), Urban group11(600), Other cities (1,800)                                                                        |
| Tibet (4,000)                                      | Chengguan district- Lhasa (2,000), Shigatse (1,000), Nyingchi (1,000)                                                                       |
| Shanxi (6,000)                                     | Xian (2,000), Yulin (1,000), Xianyang (1,000), Urban group12 (1,000), Other cities (1,000)                                                  |
| Gansu (6,000)                                      | Lanzhou (2,000), Other cities (4,000)                                                                                                       |
| Qinghai (5,000)                                    | Xining (2,000), Urban group13 (1,200), Other cities (1,800)                                                                                 |
| Ningxia (4,000)                                    | Yinchuan (2,000), Other cities (2,000)                                                                                                      |
| Xinjiang (4,000)                                   | Urumqi (2,000), Karamay (600), Other cities (1,400)                                                                                         |
| Xinjiang Production and Construction Corps (4,000) | Shihezi (1,200), Other regions (2,800)                                                                                                      |
| Total (201,000)                                    |                                                                                                                                             |
